# Supplementary material for: The Complexity of Mitochondrial Complex IV: An Update of Cytochrome c Oxidase Biogenesis in Plants
Source: MDPI journal article supplement (doi:10.3390/ijms19030662), 2018-02-27
Supplement: s1 [file s1]

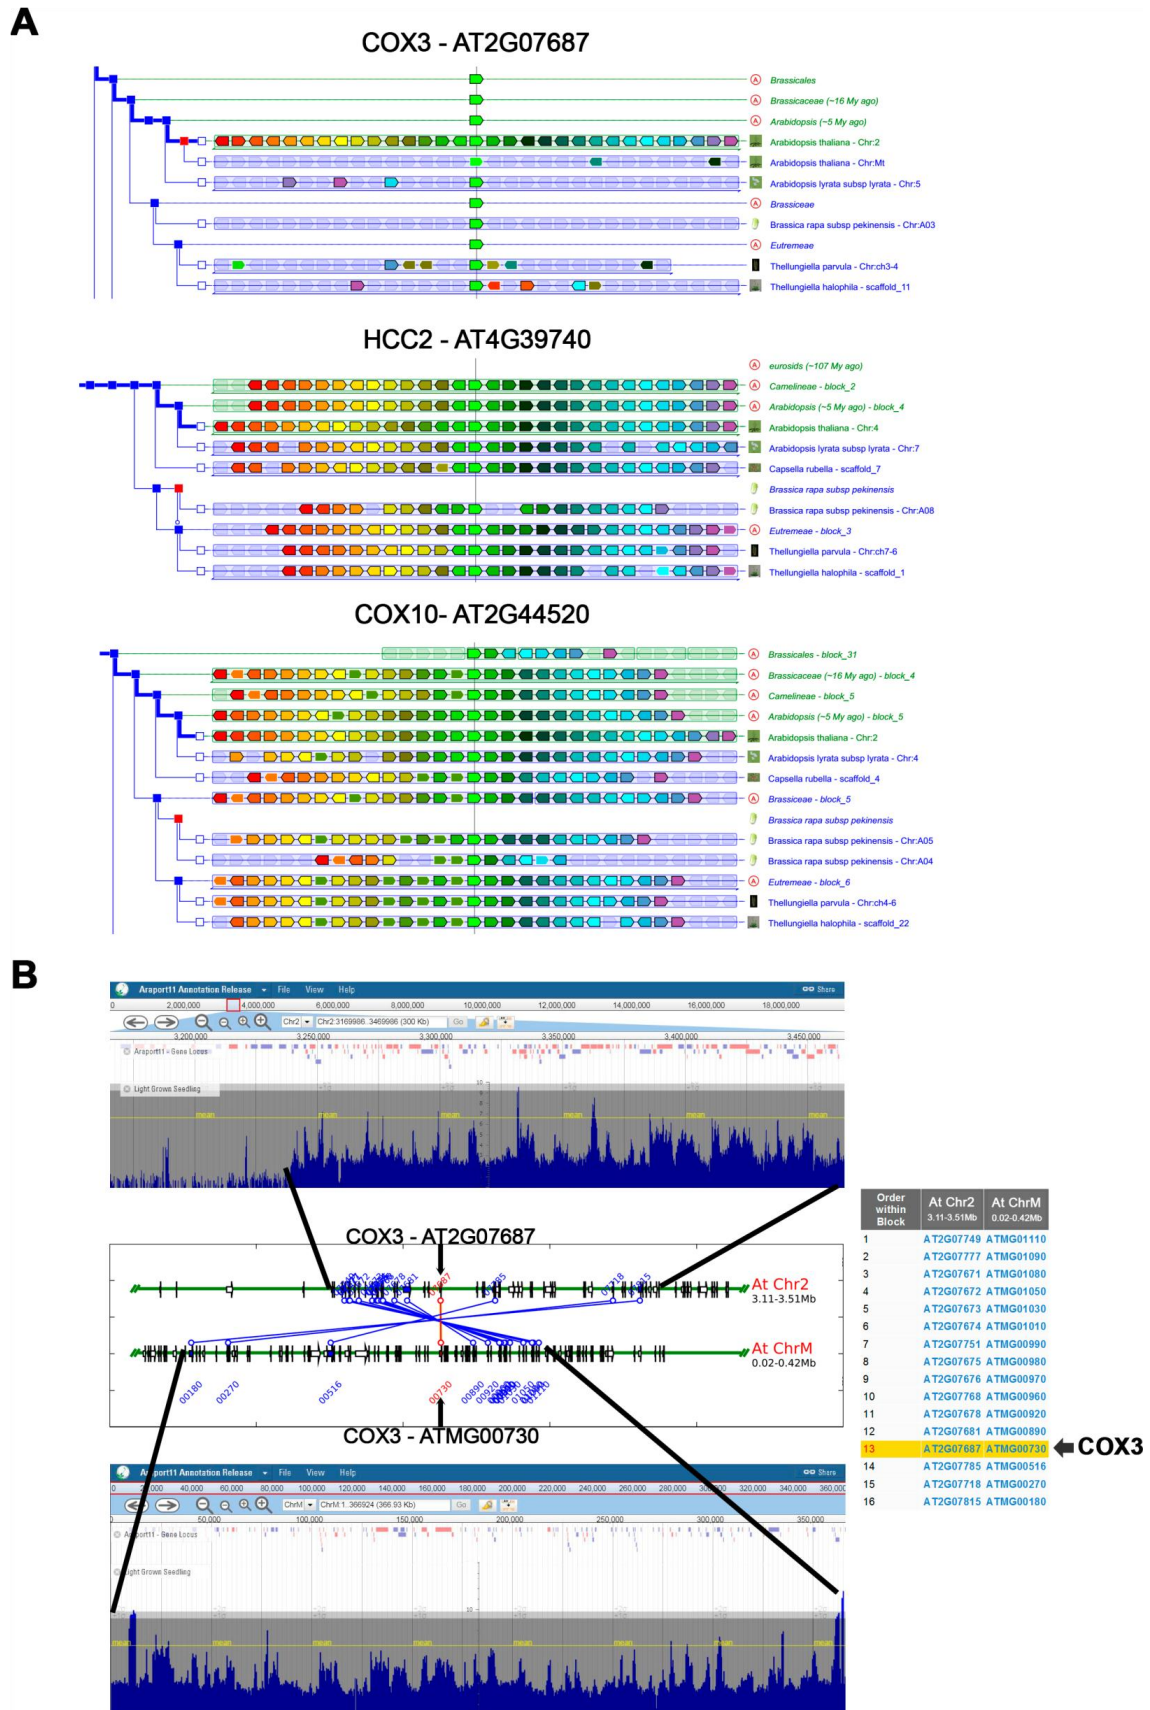

**Figure S1: COX3 has an extra copy in the nuclear chromosome 2 in Arabidopsis.** (A) Synteny analysis of the nuclear Arabidopsis COX3 gene in comparison with other Brassicaceae. AtCOX10 and AtHCC2 are other nuclear genes included in the analysis for comparison. (B) The 30 kbp region including COX3 and 15 additional genes encoding structural OXPHOS proteins or mitochondrial ribosomal proteins shows a similar arrangement in the mitochondrial and nuclear genomes. Blue lines connect similar genes. The transcriptional level of this region in both genomes, based on RNAseq data available in public databases, is shown in blue.
