# Supplementary material for: The Complexity of Mitochondrial Complex IV: An Update of Cytochrome c Oxidase Biogenesis in Plants
Source: MDPI journal article supplement (doi:10.3390/ijms19030662), 2018-02-27
Supplement: s1 [file s1]

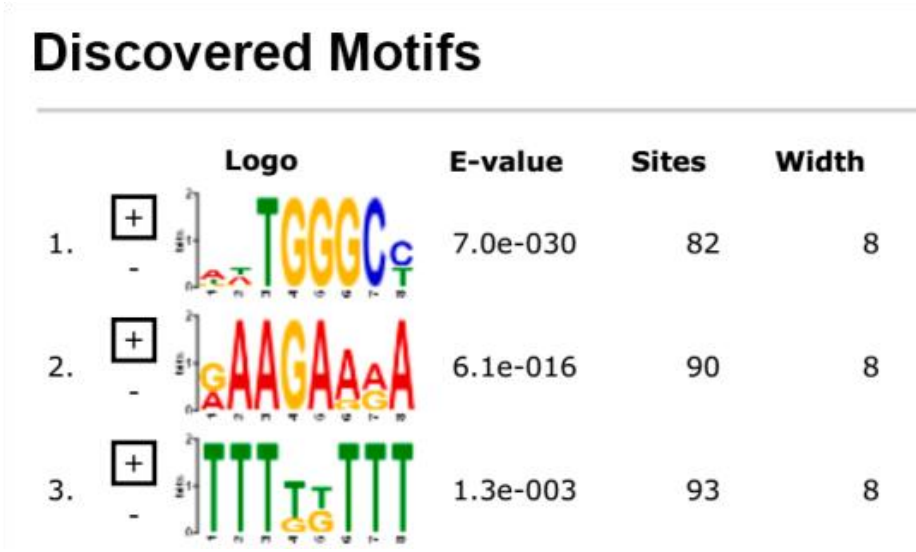

**Figure S4: Common regulatory elements in the promoter regions of nuclear COX-related genes.** Conserved consensus sequences overrepresented in the 500-bp region located upstream of the transcriptional start site of gene coding for COX-related proteins, identified using the MEME server [118].

**118.** Bailey, T.L.; Boden, M.; Buske, F.A.; Frith, M.; Grant, C.E.; Clementi, L.; Ren, J.; Li, W.W.; Noble, W.S. MEME SUITE: Tools for motif discovery and searching. *Nucleic Acids Res.* **2009**, W202–W208, doi:10.1093/nar/gkp335.
