# Supplementary material for: The Complexity of Mitochondrial Complex IV: An Update of Cytochrome c Oxidase Biogenesis in Plants
Source: Int J Mol Sci. 2018 Feb 27;19(3):662. doi: 10.3390/ijms19030662 (PMC5877523; doi:10.3390/ijms19030662)
Supplement: Supplementary file 1 [file ijms-19-00662-s001.zip]

Archive with 6 entries (6 files):
- ijms-265590-supp-final.pdf
- ijms-265590-supp-final.docx
- Figure S3-2nd_ew.pdf
- Figure S1-2nd_ew.pdf
- Figure S4-2nd_ew.pdf
- Figure S2-2nd_ew.pdf
